# Supplementary material for: Solid-state conformations of oligopeptides possessing an -(Aib-ΔZPhe)2- segment†
Source: Royal Society of Chemistry journal article supplement (doi:10.1039/b100774m), 2001-01-01

## Supplementary data

### **Solid-State Conformations of Oligopeptides Possessing a $-(\text{Aib}-\Delta^Z\text{Phe})_2-$ Segment**

**Yoshihito Inai,\* Tatsuo Oshikawa,<sup>§</sup> Mitsuji Yamashita,<sup>§</sup> Tadamichi Hirabayashi, and Satoru Ashitaka**

*Department of Environmental Technology and Urban Planning,  
Graduate School of Engineering, Nagoya Institute of Technology,  
Gokiso-cho, Showa-ku, Nagoya 466-8555, Japan*

*<sup>§</sup>Department of Materials Chemistry, Faculty of Engineering, Shizuoka University, Hamamatsu 432-8561, Japan*

A Stereoview of crystal structure for peptide **1** (Boc-(Aib- $\Delta^Z$ Phe)<sub>2</sub>-Aib-OMe)

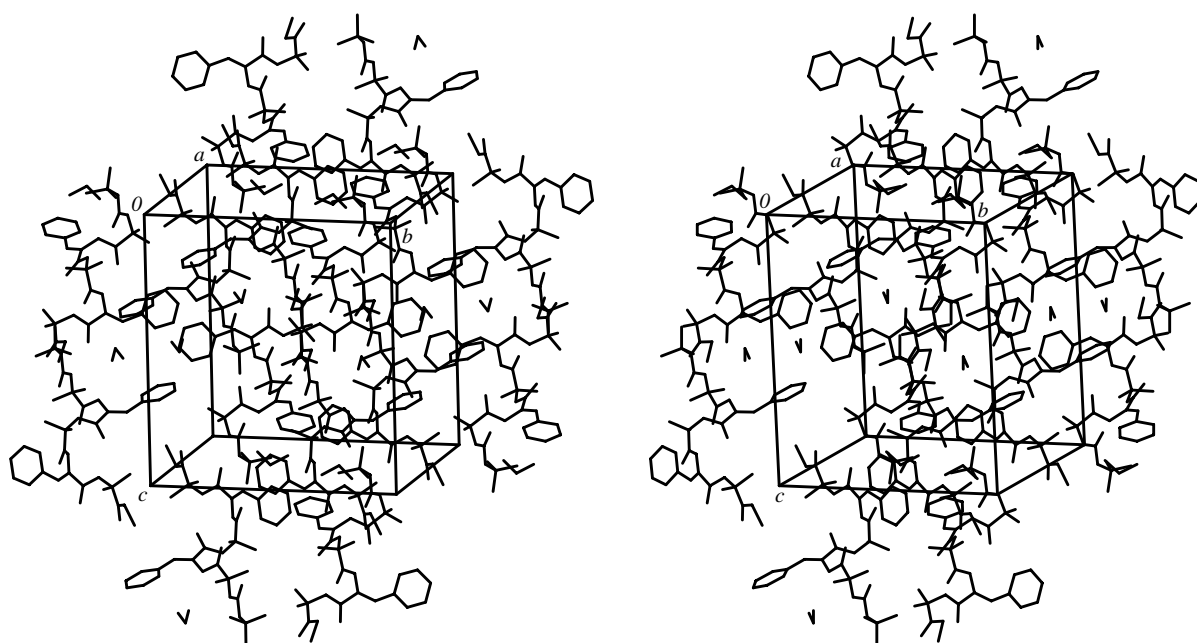

A Stereoview of crystal structure for peptide **2** (Boc-L-Pro-(Aib- $\Delta^Z$ Phe)<sub>2</sub>-Aib-OMe)

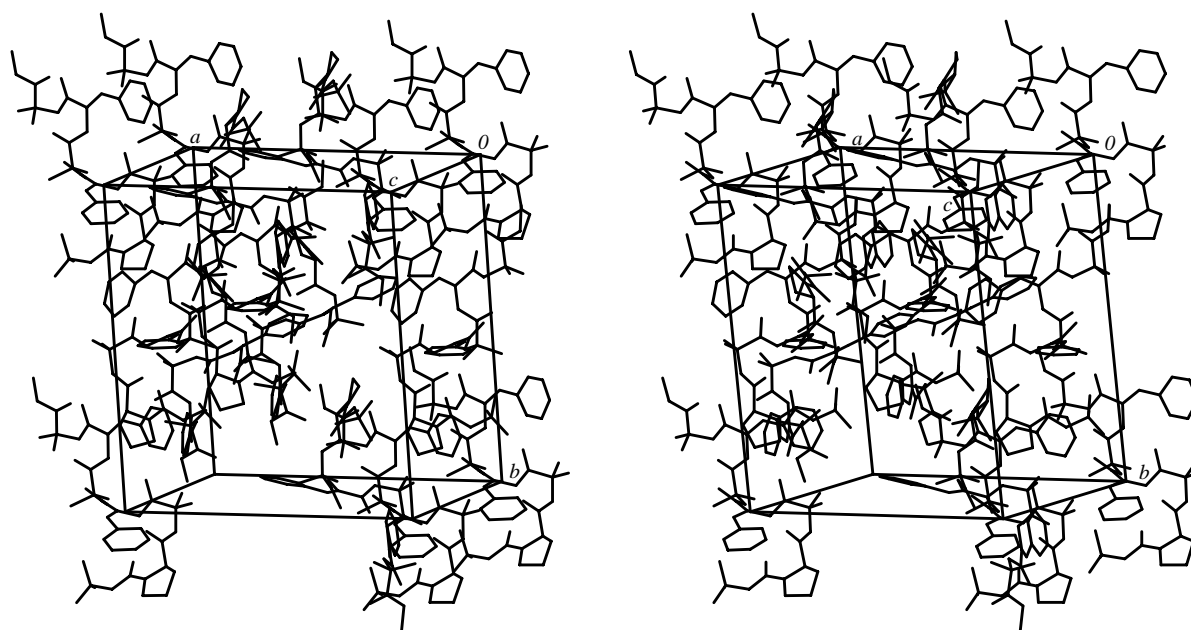

Supplement: b100774m.pdf [file b100774m.pdf]
